# Supplementary material for: A functional loop between YTH domain family protein YTHDF3 mediated m6A modification and phosphofructokinase PFKL in glycolysis of hepatocellular carcinoma
Source: PubMed Central journal article supplement (PMC9724358; doi:10.1186/s13046-022-02538-4), 2022-12-06

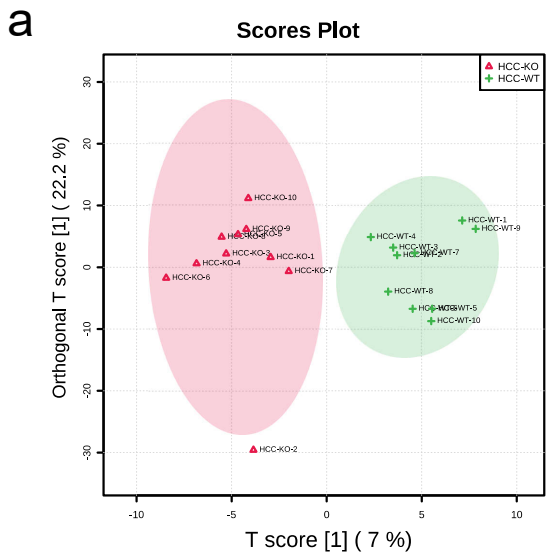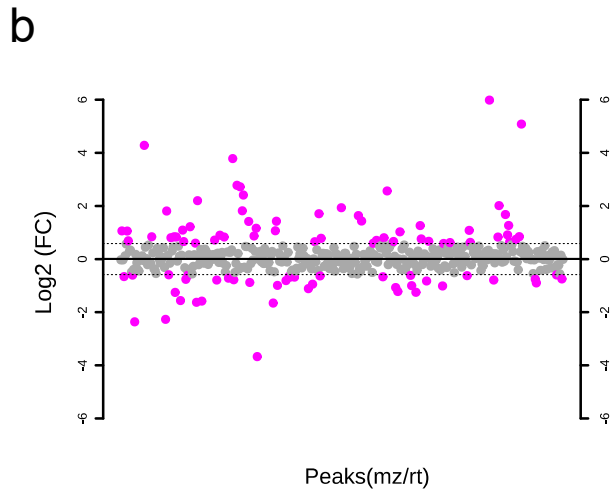

**c** **Enrichment Overview (top 25)**

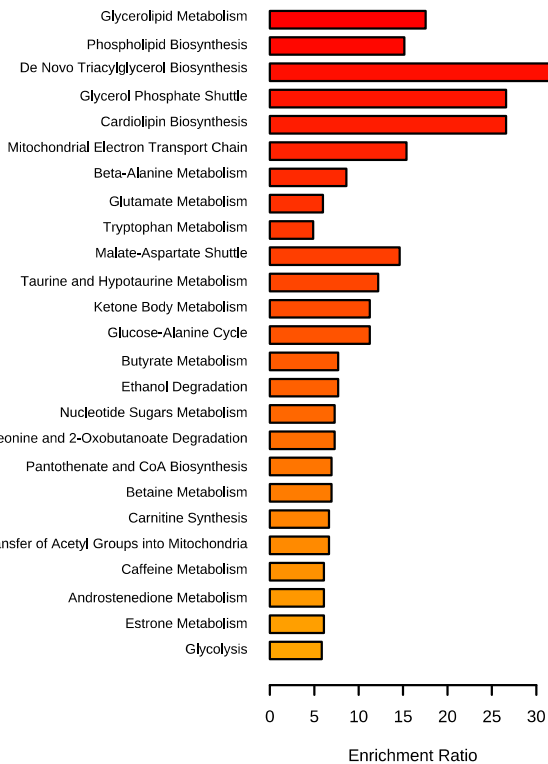

**d**

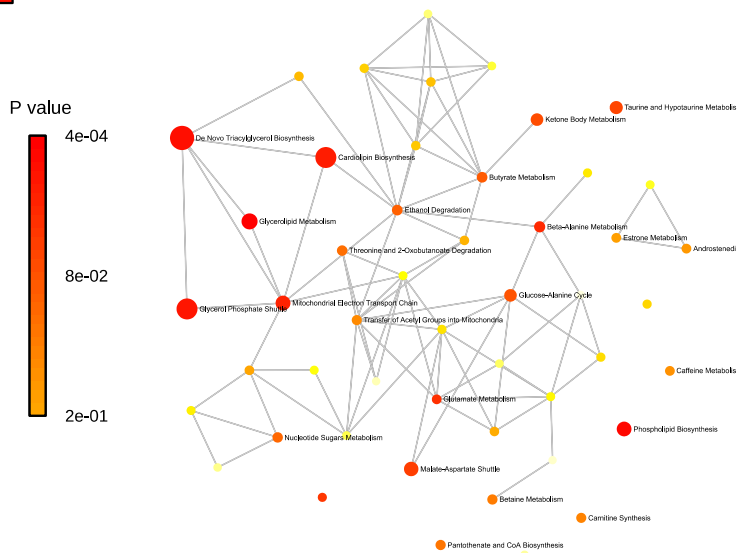

Supplement: 13046_2022_2538_MOESM4_ESM.pdf [file 13046_2022_2538_MOESM4_ESM.pdf]
